# Supplementary material
Source: HighWire-hosted journal article supplement (https://erj.ersjournals.com/content/61/2/2201512)

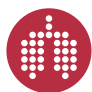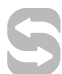

SHAREABLE PDF

# Nintedanib in children and adolescents with fibrosing interstitial lung diseases

Robin Deterding<sup>1,2,15</sup>, Lisa R. Young<sup>3,15</sup>, Emily M. DeBoer<sup>1,2</sup>, David Warburton<sup>4,5</sup>, Steven Cunningham<sup>6</sup>, Nicolaus Schwerk<sup>7</sup>, Kevin R. Flaherty<sup>8</sup>, Kevin K. Brown<sup>9</sup>, Mihaela Dumistracel<sup>10</sup>, Elvira Erhardt<sup>11</sup>, Julia Bertulis<sup>11</sup>, Martina Gahlemann<sup>12</sup>, Susanne Stowasser<sup>13</sup> and Matthias Griesse<sup>14</sup> for the InPedILD trial investigators<sup>16</sup>

<sup>1</sup>Section of Pediatric Pulmonary and Sleep Medicine, Department of Pediatrics, University of Colorado Denver, Denver, CO, USA. <sup>2</sup>The Children's Hospital Colorado, Aurora, CO, USA. <sup>3</sup>Division of Pulmonary and Sleep Medicine, The Children's Hospital of Philadelphia, Philadelphia, PA, USA. <sup>4</sup>Children's Hospital Los Angeles, Los Angeles, CA, USA. <sup>5</sup>Keck School of Medicine, University of Southern California, Los Angeles, CA, USA. <sup>6</sup>Centre for Inflammation Research, University of Edinburgh, Edinburgh, UK. <sup>7</sup>Clinic for Pediatric Pulmonology, Allergology and Neonatology, Hannover Medical School, Hannover, Germany. <sup>8</sup>Division of Pulmonary and Critical Care Medicine, University of Michigan, Ann Arbor, MI, USA. <sup>9</sup>Department of Medicine, National Jewish Health, Denver, CO, USA. <sup>10</sup>Boehringer Ingelheim Pharma GmbH & Co. KG, Ingelheim am Rhein, Germany. <sup>11</sup>Boehringer Ingelheim Pharma GmbH & Co. KG, Biberach, Germany. <sup>12</sup>Boehringer Ingelheim (Schweiz) GmbH, Basel, Switzerland. <sup>13</sup>Boehringer Ingelheim International GmbH, Ingelheim am Rhein, Germany. <sup>14</sup>Hauner Children's Hospital, Ludwig Maximilians University, German Center for Lung Research (DZL), Munich, Germany. <sup>15</sup>These two authors contributed equally. <sup>16</sup>A full list of InPedILD trial investigators is provided in the supplementary material.

Corresponding author: Robin Deterding ([robin.deterding@childrenscolorado.org](mailto:robin.deterding@childrenscolorado.org))

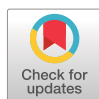

Shareable abstract (@ERSpublications)

The results of the randomised placebo-controlled InPedILD trial support a positive benefit-risk assessment for use of nintedanib in children and adolescents with fibrosing ILD <https://bit.ly/3qnAhUM>

**Cite this article as:** Deterding R, Young LR, DeBoer EM, *et al.* Nintedanib in children and adolescents with fibrosing interstitial lung diseases. *Eur Respir J* 2023; 61: 2201512 [DOI: 10.1183/13993003.01512-2022].

This single-page version can be shared freely online.

Copyright ©The authors 2023.

This version is distributed under the terms of the Creative Commons Attribution Non-Commercial Licence 4.0. For commercial reproduction rights and permissions contact [permissions@ersnet.org](mailto:permissions@ersnet.org)

This article has an editorial commentary: <https://doi.org/10.1183/13993003.01797-2022>

Received: 29 July 2022  
Accepted: 25 Aug 2022

## Abstract

**Background** Childhood interstitial lung disease (ILD) comprises a spectrum of rare ILDs affecting infants, children and adolescents. Nintedanib is a licensed treatment for pulmonary fibrosis in adults. The primary objectives of the InPedILD trial were to determine the dose-exposure and safety of nintedanib in children and adolescents with fibrosing ILD.

**Methods** Patients aged 6–17 years with fibrosing ILD on high-resolution computed tomography and clinically significant disease were randomised 2:1 to receive nintedanib or placebo for 24 weeks and then open-label nintedanib. Dosing was based on weight-dependent allometric scaling. Co-primary end-points were the area under the plasma concentration–time curve at steady state ( $AUC_{\tau,ss}$ ) at weeks 2 and 26 and the proportion of patients with treatment-emergent adverse events at week 24.

**Results** 26 patients received nintedanib and 13 patients received placebo. The geometric mean (geometric coefficient of variation)  $AUC_{\tau,ss}$  for nintedanib was  $175 \mu\text{g}\cdot\text{h}\cdot\text{L}^{-1}$  (85.1%) in patients aged 6–11 years and  $167 \mu\text{g}\cdot\text{h}\cdot\text{L}^{-1}$  (83.6%) in patients aged 12–17 years. In the double-blind period, adverse events were reported in 84.6% of patients in each treatment group. Two patients discontinued nintedanib due to adverse events. Diarrhoea was reported in 38.5% and 15.4% of the nintedanib and placebo groups, respectively. Adjusted mean $\pm$ SE changes in percentage predicted forced vital capacity at week 24 were  $0.3\pm 1.3\%$  in the nintedanib group and  $-0.9\pm 1.8\%$  in the placebo group.

**Conclusions** In children and adolescents with fibrosing ILD, a weight-based dosing regimen resulted in exposure to nintedanib similar to adults and an acceptable safety profile. These data provide a scientific basis for the use of nintedanib in this patient population.

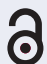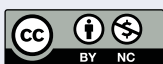

Supplement: inline-supplementary-material-2 [file inline-supplementary-material-2.pdf]
